# Supplementary material
Source: MDPI journal article supplement (https://www.mdpi.com/2075-163X/11/8/805)
Supplement: s1 [file s1]

## Supplementary Figures

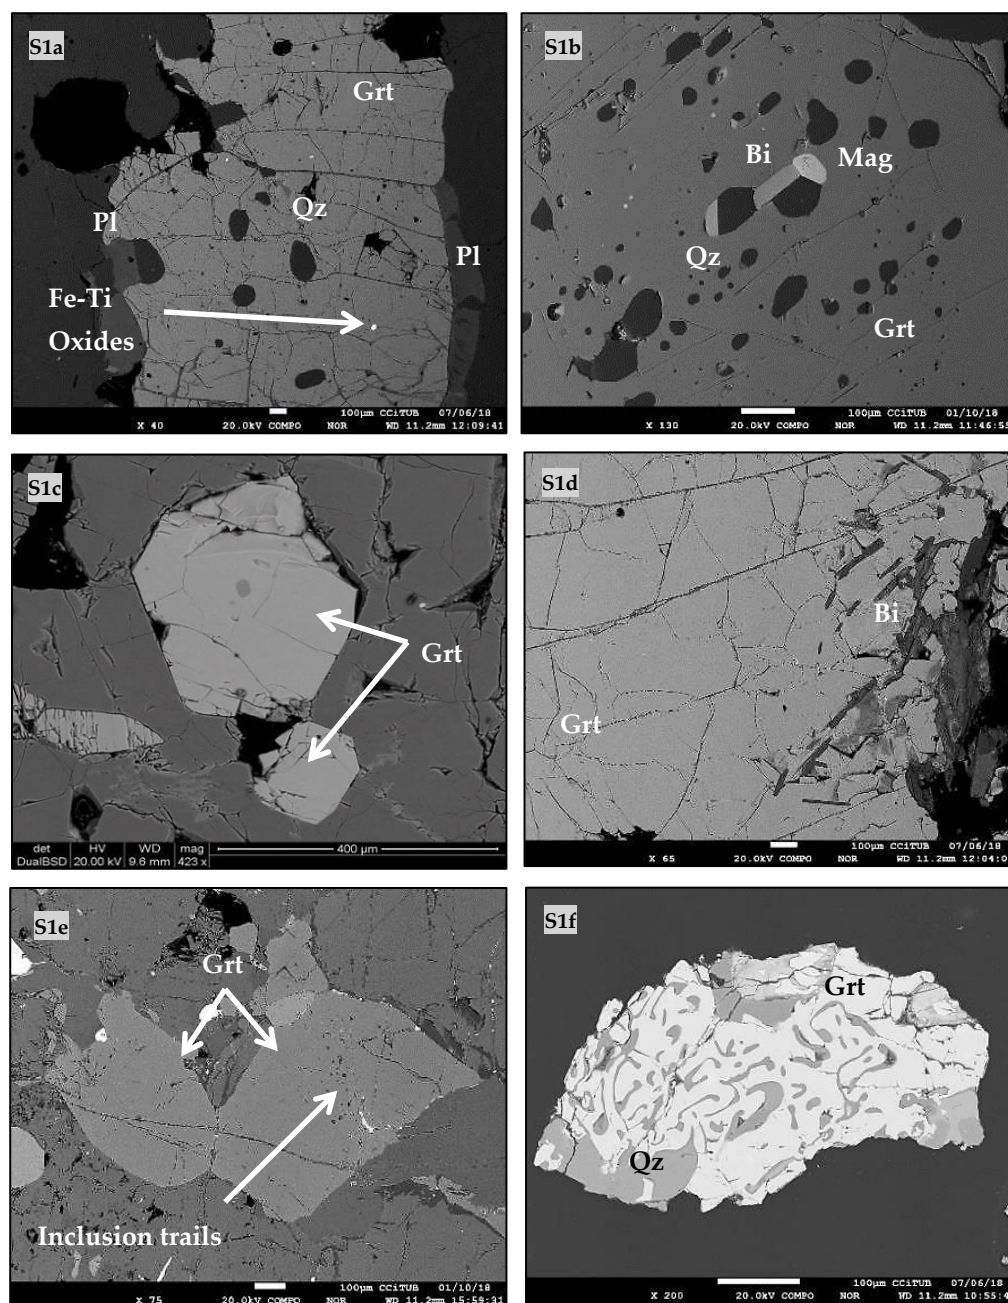

**Figure S1.** Wavelength-dispersive spectrometry images from studied Grts: (a) Subalotriomorphic Grt blastopoikilitic of Qz, Fsp, and Fe-Ti oxides from Qz-Fps paragneiss (LCOx9a); (b) Grt blastopoikilitic of Qz, Bi, and Fe-Ti oxides from intermediate orthogneiss (LCOx64); (c) Idiomorphic Grt from Qz-Fps paragneiss (LCOx59a); (d) Bi at Grt rims from Qz-Fps paragneiss (LCOx9a); (e) Subalotriomorphic Grt from ultramafic granulite with inclusion trails (LCOx35); (f) Grt and Qz symplectite from Qz-Fps paragneiss (LCOx66).

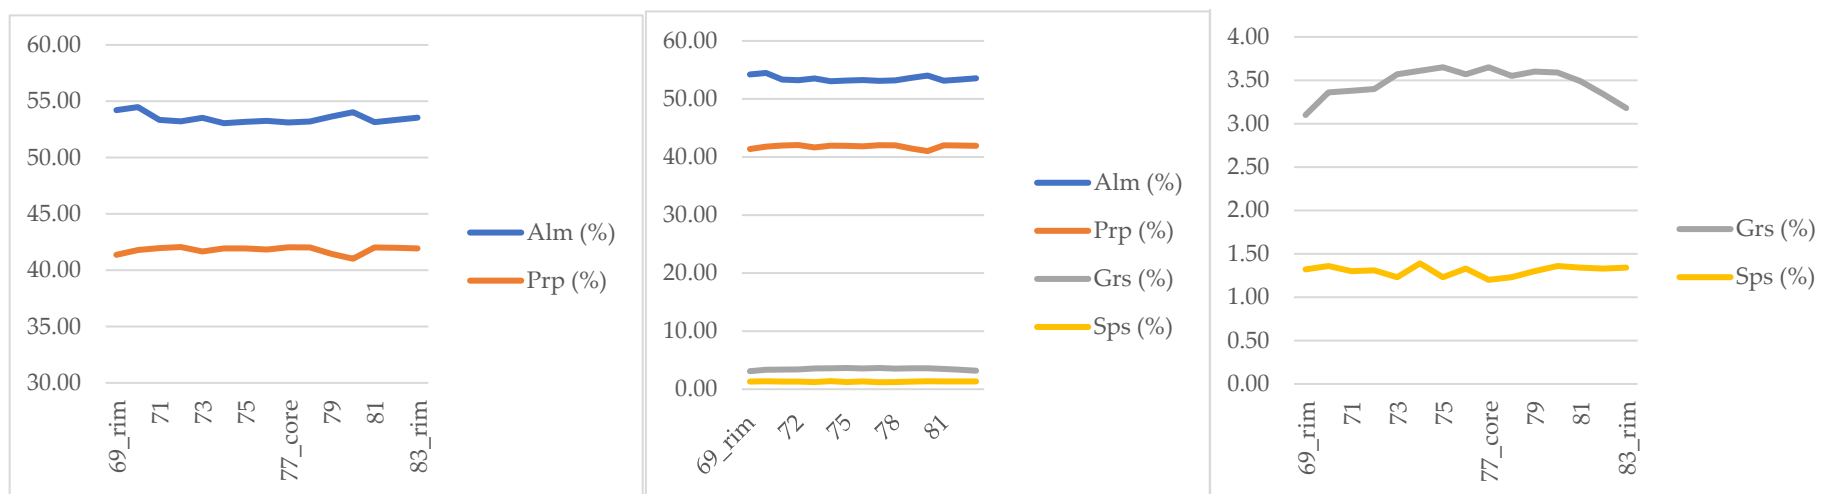

**Figure S2.** Rim – core – rim Grt major element profiles (Fe, Mg, Ca and Mn in % moles) from studied Grts: Submitted in xlsx format.

S3a

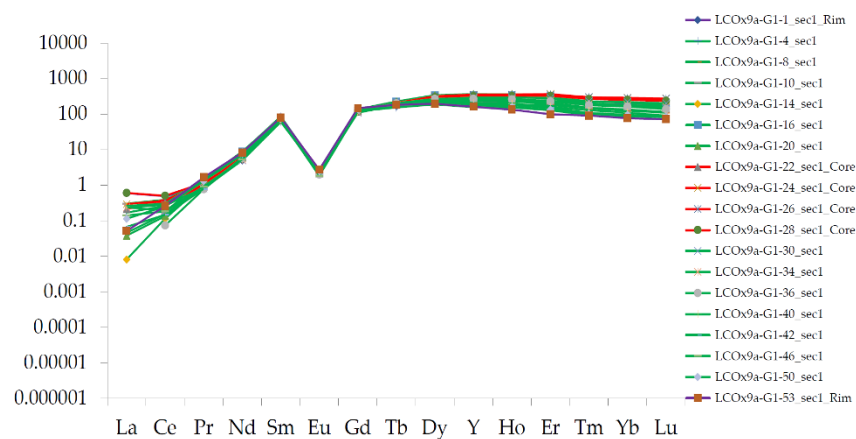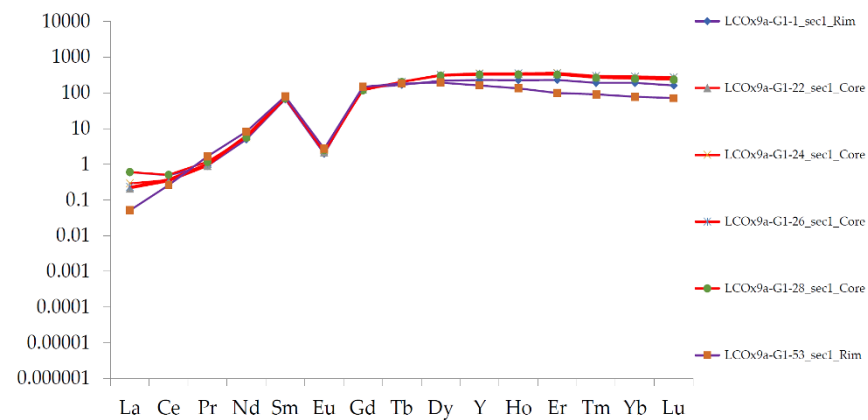

S3b

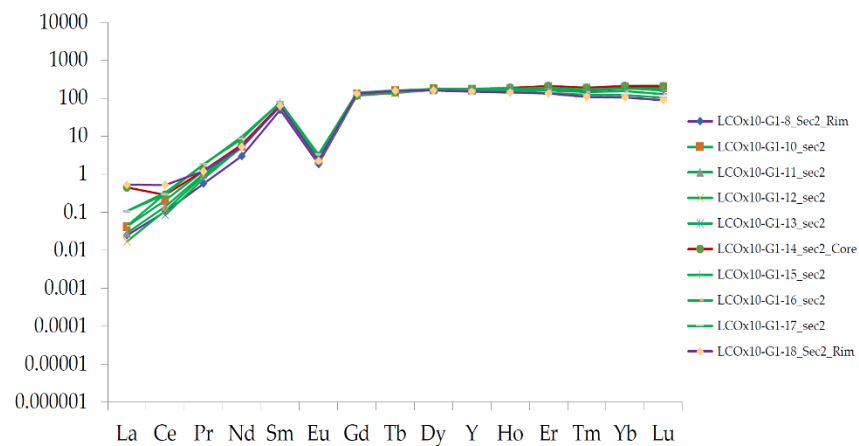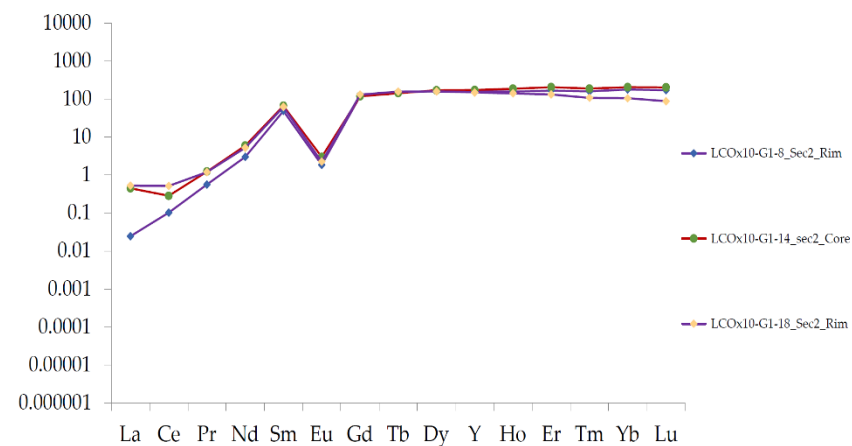

S3c

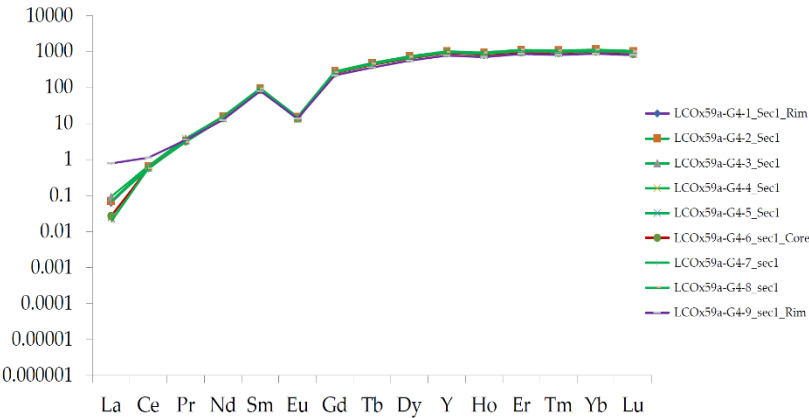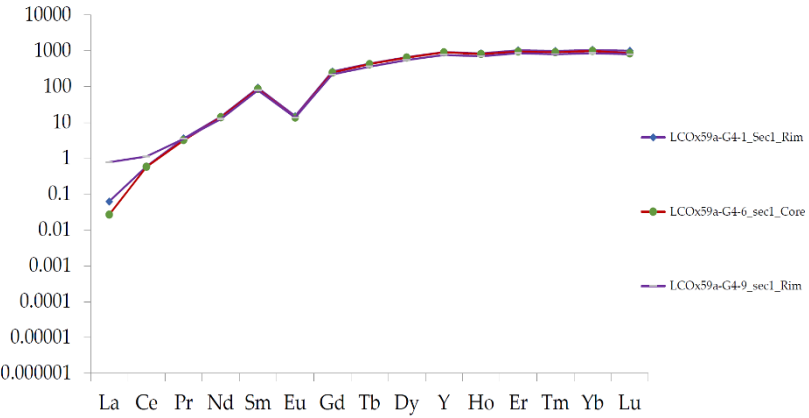

S3d

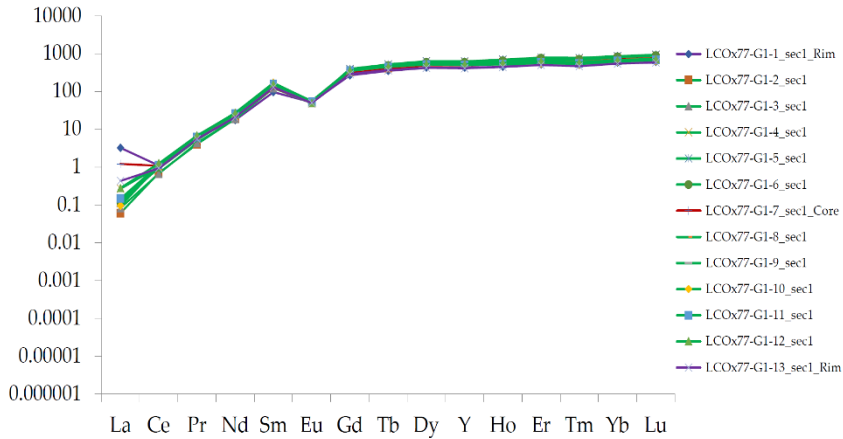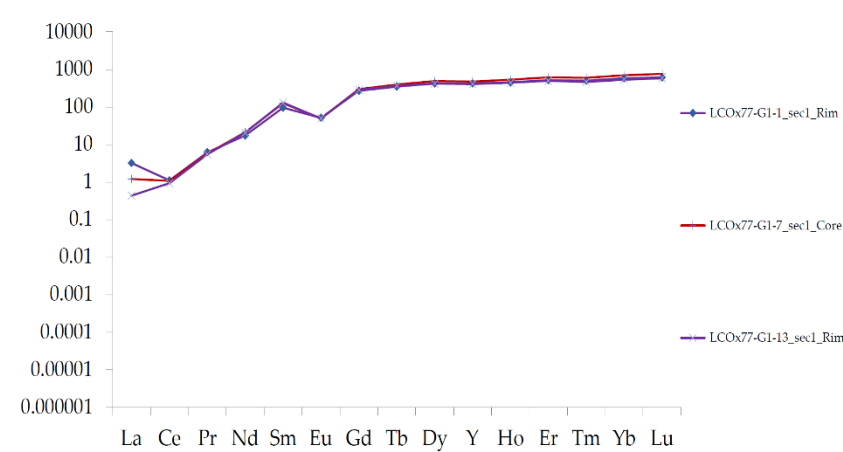

S3e

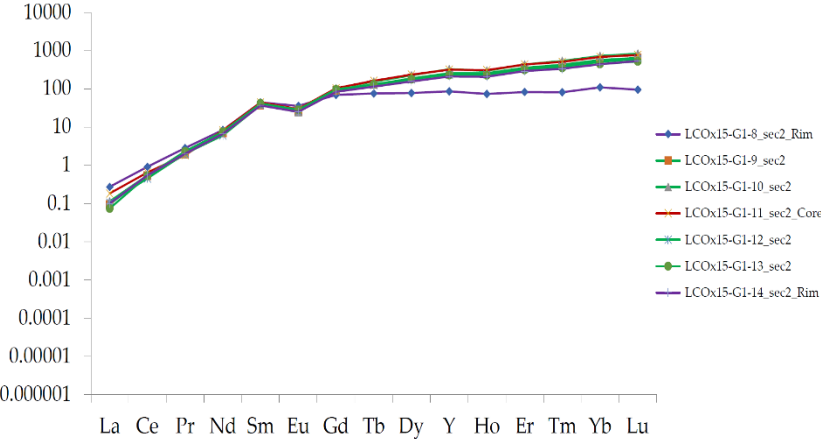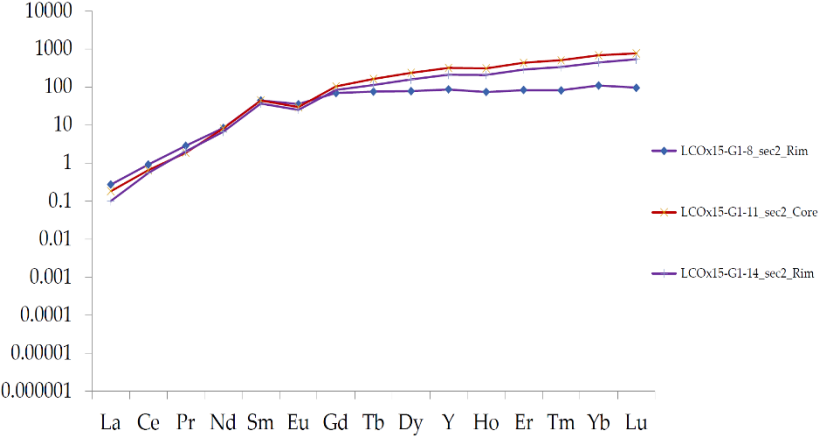

S3g

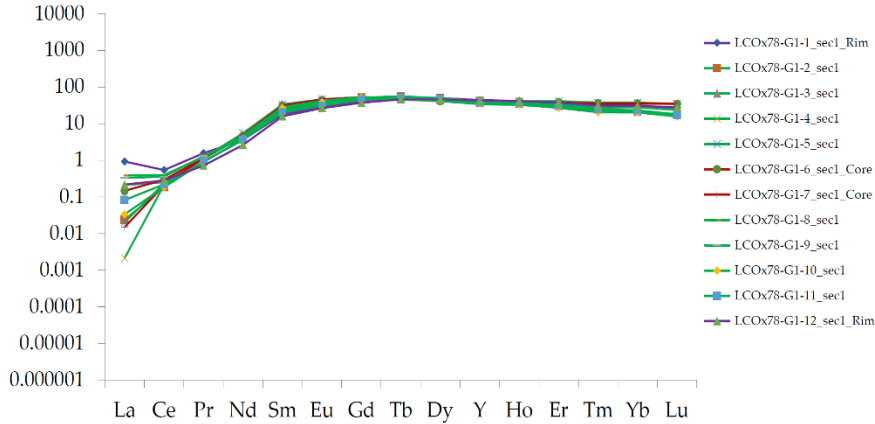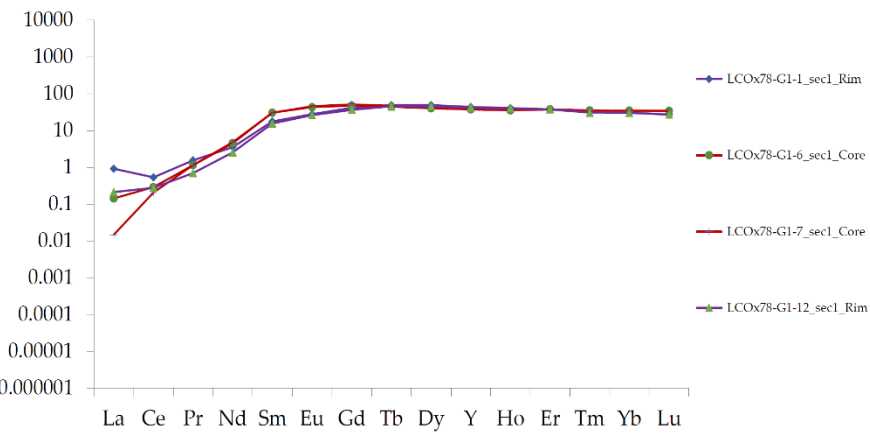

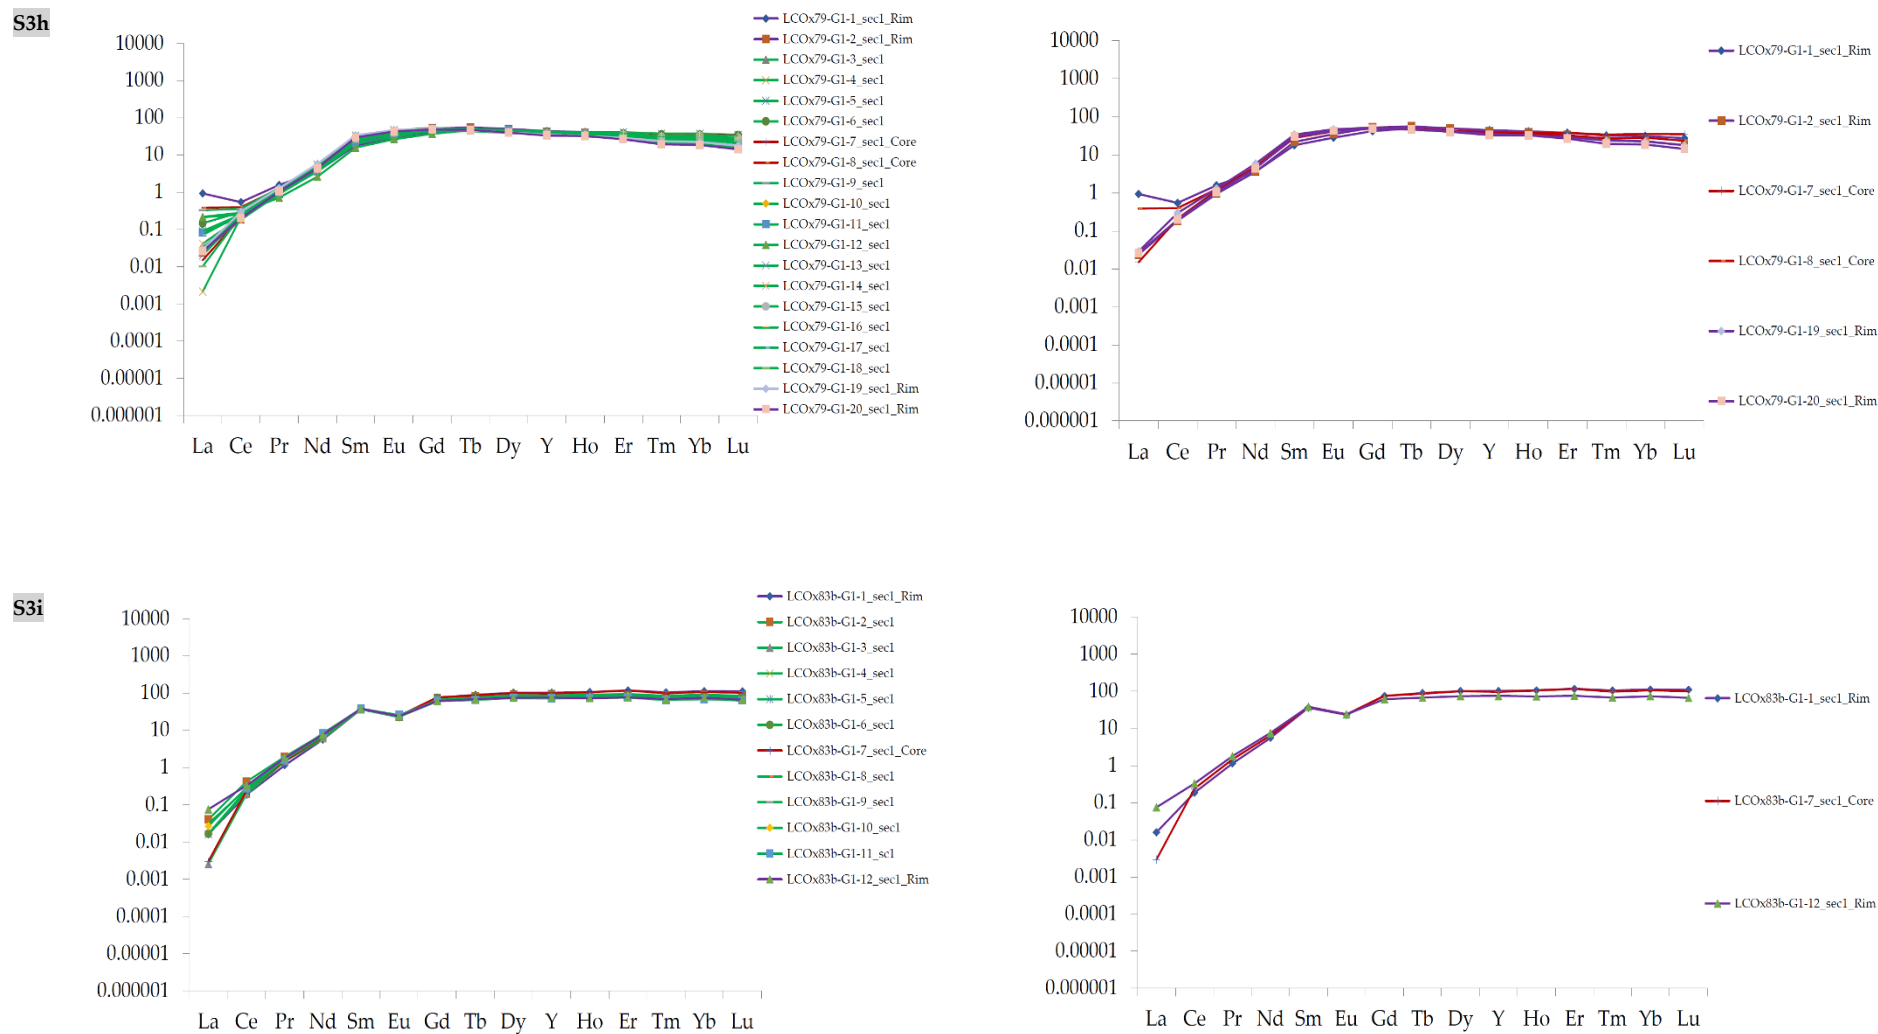

S3j

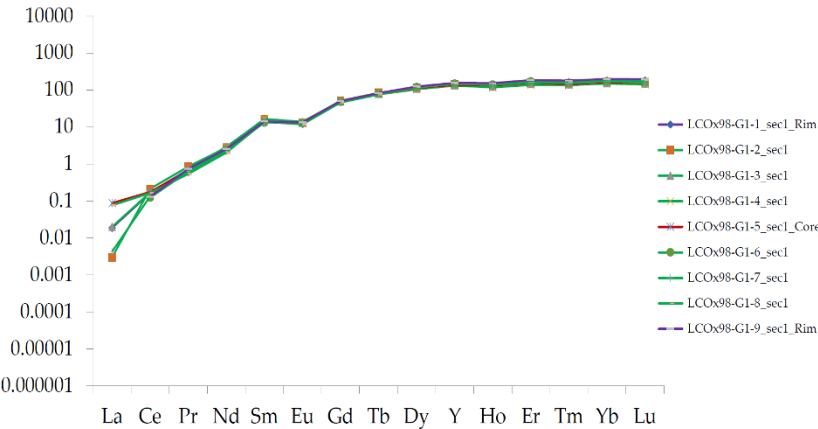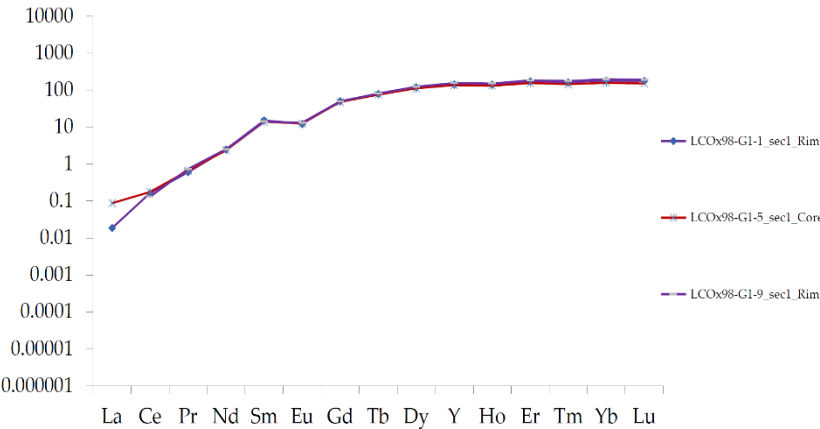

S3k

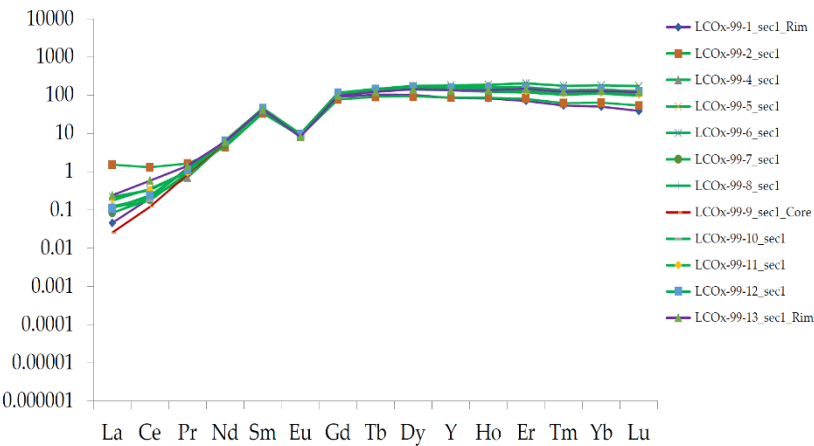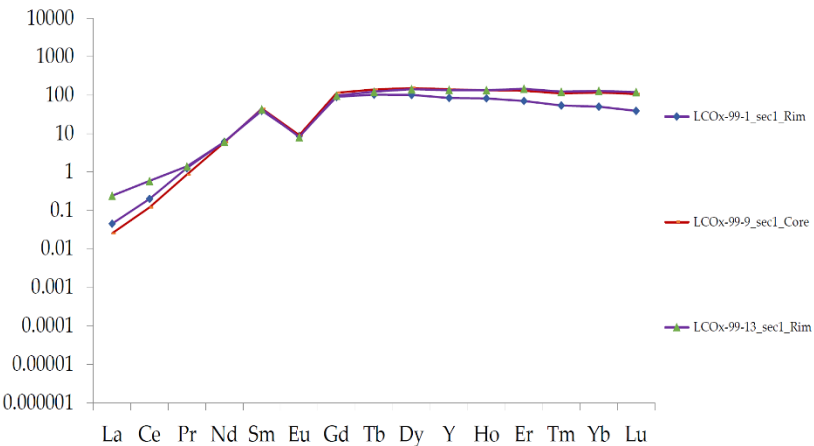

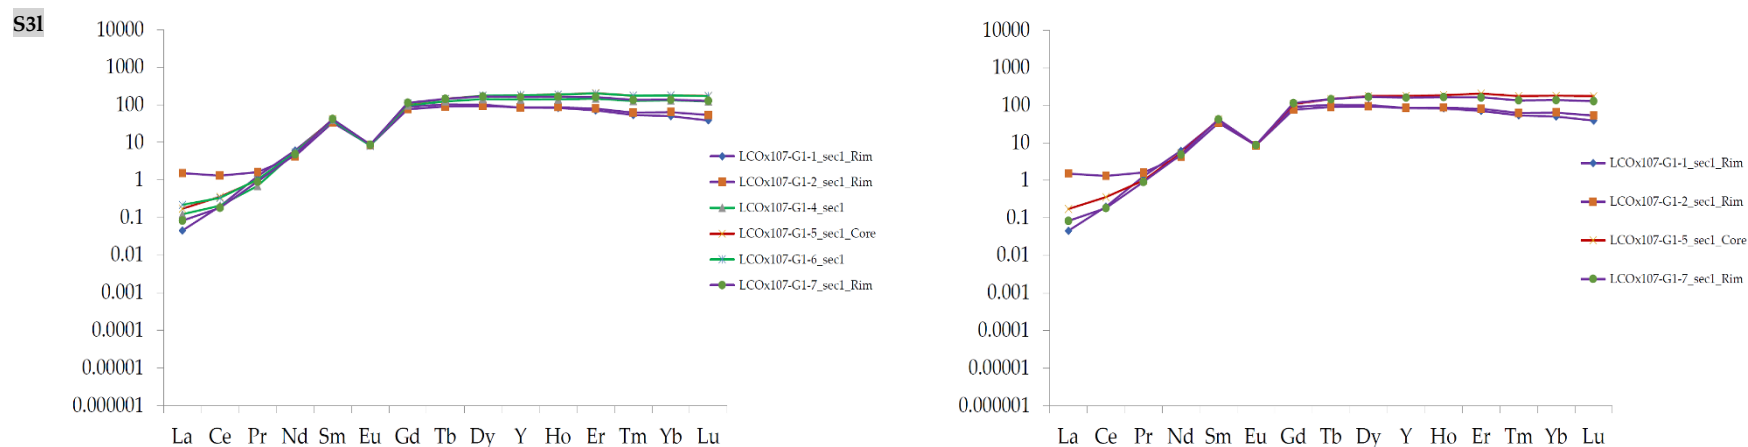

**Figure S3.** Rim – core- rim Grt trace element patterns normalized to the chondritic reservoir (CHUR, [44]): (a) Qz-Fsp paragneiss (LCOx9a); (b) Qz-Fsp paragneiss (LCOx10); (c) Qz-Fsp paragneiss (LCOx59a); (d) Qz-Fsp paragneiss (LCOx77); (e) Orthogneiss (LCOx15); (f) Orthogneiss (LCOx49); (g) Orthogneiss (LCOx78); (h) Orthogneiss (LCOx79); (i) Orthogneiss (LCOx83b); (j) Orthogneiss (LCOx98); (k) Orthogneiss (LCOx99); (l) Orthogneiss (LCOx107).
